# Supplementary material for: CDK5 functions as a tumor promoter in human colorectal cancer via modulating the ERK5–AP-1 axis
Source: PubMed Central journal article supplement (PMC5133995; doi:10.1038/cddis.2016.333), 2016-10-13
Supplement: cddis2016333x1.pdf [file cddis2016333x1.pdf]

**Table S1**

The clinicopathological characteristics of 89 clinical samples in TMA

| Sample ID | Status | Survival time (months) | Gender | Age (years) | Differentiation | Tumor size (cm) | AJCC stage | CDK5 score |
|-----------|--------|------------------------|--------|-------------|-----------------|-----------------|------------|------------|
| 1454      | Alive  | 64                     | Male   | 72          | Moderate        | 6.5             | IIA        | 4          |
| 1455      | Dead   | 1                      | Female | 57          | Moderate        | 6.5             | IIIA       | 4          |
| 1456      | Dead   | 13                     | Male   | 76          | Moderate        | 5.5             | IIA        | 4          |
| 1458      | Alive  | 64                     | Female | 63          | Moderate        | 4.5             | IIA        | 3          |
| 1461      | Alive  | 63                     | Female | 78          | Moderate        | 7               | IIIC       | 4          |
| 1462      | Dead   | 22                     | Male   | 78          | Moderate        | 8               | IV         | 6          |
| 1464      | Dead   | 7                      | Male   | 63          | Poor            | 5.5             | IIIC       | 4          |
| 1502      | Alive  | 63                     | Female | 68          | Moderate        | 6               | IIA        | 4          |
| 1503      | Alive  | 63                     | Male   | 39          | Moderate        | 6               | IIB        | 2          |
| 1504      | Dead   | 23                     | Male   | 68          | Moderate        | 5.5             | I          | 1          |
| 1505      | Alive  | 63                     | Male   | 62          | Moderate        | 2.5             | IIA        | 3          |
| 1508      | Alive  | 63                     | Male   | 78          | Moderate        | 5               | IIA        | 4          |
| 1510      | Dead   | 44                     | Female | 50          | Moderate        | 4               | IIB        | 6          |
| 1556      | Alive  | 62                     | Male   | 73          | Moderate        | 11              | IIA        | 3          |
| 1557      | Dead   | 38                     | Male   | 68          | Moderate        | 6               | IIB        | 6          |
| 1558      | Dead   | 13                     | Female | 87          | Moderate        | 6               | IIIC       | 9          |
| 1559      | Dead   | 8                      | Female | 52          | Poor            | 7               | IIB        | 6          |
| 1560      | Alive  | 62                     | Female | 51          | Moderate        | 2.7             | I          | 2          |
| 1561      | Dead   | 56                     | Male   | 55          | Moderate        | 3.5             | IIIC       | 6          |
| 1562      | Dead   | 17                     | Male   | 73          | Poor            | 6.5             | IV         | 9          |
| 1563      | Alive  | 62                     | Female | 61          | Moderate        | 3               | IIA        | 2          |
| 1564      | Dead   | 12                     | Female | 48          | Poor            | 1.5             | IIA        | 3          |
| 1565      | Alive  | 62                     | Female | 59          | Moderate        | 3               | I          | 2          |
| 1566      | Dead   | 40                     | Female | 77          | Moderate        | 4               | I          | 2          |

|      |       |    |        |    |          |     |      |   |
|------|-------|----|--------|----|----------|-----|------|---|
| 1567 | Dead  | 42 | Male   | 78 | Moderate | 5   | IIIB | 4 |
| 1570 | Alive | 62 | Male   | 31 | Poor     | 4   | IIIB | 3 |
| 1571 | Dead  | 33 | Female | 79 | Moderate | 7   | IIA  | 4 |
| 1572 | Alive | 61 | Male   | 81 | Moderate | 4   | IIIB | 4 |
| 1573 | Alive | 61 | Male   | 85 | Moderate | 4.3 | IIA  | 2 |
| 1574 | Dead  | 40 | Male   | 90 | Moderate | 7   | IIB  | 4 |
| 1576 | Alive | 61 | Female | 70 | Moderate | 4.5 | I    | 2 |
| 1577 | Dead  | 23 | Female | 66 | Poor     | 5   | IIIC | 3 |
| 1579 | Alive | 61 | Male   | 73 | Moderate | 3.5 | IIA  | 3 |
| 1614 | Alive | 61 | Female | 54 | Moderate | 3.5 | IIA  | 2 |
| 1615 | Alive | 61 | Male   | 50 | Well     | 4   | I    | 4 |
| 1616 | Alive | 61 | Female | 74 | Well     | 5   | IIA  | 2 |
| 1617 | Alive | 61 | Male   | 80 | Moderate | 8   | IIA  | 4 |
| 1619 | Alive | 61 | Female | 65 | Moderate | 4   | IIA  | 4 |
| 1620 | Alive | 61 | Female | 59 | Moderate | 4.5 | IIA  | 1 |
| 1622 | Alive | 61 | Male   | 79 | Moderate | 4   | IIA  | 4 |
| 1624 | Dead  | 13 | Female | 76 | Moderate | 3.5 | IIIB | 1 |
| 1625 | Alive | 60 | Female | 76 | Moderate | 8   | IIA  | 2 |
| 1626 | Dead  | 39 | Male   | 63 | Moderate | 5   | IIIB | 6 |
| 1628 | Dead  | 25 | Female | 76 | Moderate | 8   | IIIB | 9 |
| 1629 | Alive | 61 | Male   | 56 | Moderate | 4   | IIA  | 3 |
| 1630 | Alive | 60 | Female | 44 | Moderate | 8   | I    | 6 |
| 1663 | Dead  | 13 | Male   | 73 | Moderate | 5.5 | IIA  | 3 |
| 1668 | Alive | 60 | Female | 66 | Moderate | 7.5 | IIIA | 6 |
| 1669 | Dead  | 1  | Female | 48 | Moderate | 8   | IIA  | 6 |
| 1732 | Alive | 59 | Male   | 79 | Moderate | 6   | IIA  | 2 |
| 1733 | Alive | 59 | Male   | 55 | Poor     | 5   | IIIB | 1 |
| 1735 | Alive | 59 | Female | 65 | Moderate | 4   | IIA  | 1 |

|      |       |    |        |    |          |     |      |   |
|------|-------|----|--------|----|----------|-----|------|---|
| 1740 | Dead  | 7  | Female | 73 | Moderate | 8   | IIIB | 4 |
| 1741 | Alive | 59 | Male   | 81 | Moderate | 8   | IIIB | 2 |
| 1742 | Alive | 59 | Male   | 61 | Moderate | 4.5 | I    | 6 |
| 1743 | Dead  | 16 | Male   | 65 | Poor     | 6   | IIIC | 6 |
| 1744 | Dead  | 16 | Male   | 61 | Poor     | 4   | IV   | 4 |
| 1745 | Alive | 59 | Male   | 80 | Moderate | 4   | IIA  | 9 |
| 1756 | Alive | 58 | Female | 71 | Moderate | 3   | IIIB | 3 |
| 1758 | Alive | 58 | Female | 55 | Poor     | 11  | IIA  | 6 |
| 1762 | Alive | 58 | Female | 69 | Moderate | 8   | IIB  | 3 |
| 1764 | Alive | 58 | Female | 80 | Poor     | 6   | IIIB | 4 |
| 1765 | Dead  | 21 | Male   | 55 | Moderate | 4   | IIB  | 3 |
| 1767 | Alive | 58 | Male   | 83 | Well     | 5   | IIA  | 2 |
| 1811 | Alive | 57 | Male   | 73 | Well     | 7   | IIB  | 2 |
| 1813 | Alive | 57 | Female | 82 | Poor     | 4   | IIIB | 1 |
| 1814 | Alive | 57 | Female | 69 | Moderate | 2   | I    | 6 |
| 1815 | Alive | 57 | Female | 46 | Moderate | 6   | IIA  | 3 |
| 1819 | Alive | 57 | Female | 56 | Moderate | 4.5 | IIA  | 4 |
| 1820 | Alive | 56 | Female | 78 | Moderate | 4.5 | IIA  | 2 |
| 1836 | Alive | 56 | Female | 81 | Moderate | 6   | IIB  | 1 |
| 1839 | Alive | 56 | Male   | 73 | Moderate | 5   | IIB  | 3 |
| 1841 | Alive | 56 | Female | 50 | Moderate | 6   | IIA  | 6 |
| 1904 | Dead  | 19 | Female | 27 | Poor     | 4   | IIIC | 2 |
| 1907 | Dead  | 35 | Male   | 54 | Moderate | 5   | IIA  | 6 |
| 1914 | Alive | 55 | Female | 77 | Moderate | 5   | IIIB | 3 |
| 1915 | Alive | 55 | Female | 55 | Moderate | 9   | IIIB | 4 |
| 1917 | Alive | 55 | Male   | 66 | Moderate | 2.7 | I    | 6 |
| 1918 | Dead  | 42 | Male   | 60 | Moderate | 3.5 | IIIC | 9 |
| 1919 | Dead  | 19 | Male   | 65 | Moderate | 5   | IIIB | 9 |

|      |       |    |        |    |          |     |      |   |
|------|-------|----|--------|----|----------|-----|------|---|
| 1921 | Dead  | 15 | Male   | 56 | Moderate | 6   | IIIB | 9 |
| 1923 | Alive | 55 | Male   | 54 | Moderate | 6.5 | IIIB | 2 |
| 1927 | Dead  | 19 | Male   | 67 | Moderate | 6   | IIIB | 6 |
| 1928 | Alive | 55 | Female | 52 | Moderate | 5.5 | I    | 6 |
| 1929 | Dead  | 23 | Female | 62 | Moderate | 5   | IIIB | 6 |
| 1990 | Alive | 57 | Male   | 43 | Moderate | 4   | IIA  | 9 |
| 1991 | Alive | 57 | Male   | 83 | Moderate | 4   | IIB  | 4 |
| 1992 | Alive | 56 | Male   | 66 | Moderate | 4   | IIA  | 3 |
| 1993 | Dead  | 0  | Male   | 82 | Poor     | 7   | IIIC | 3 |

**Table S2**

Univariate and multivariate analyses of various prognosis parameters in 89 CRC patients using Cox regression model

| Variable                               | All case | Univariate analysis |                  | Multivariate analysis |              |
|----------------------------------------|----------|---------------------|------------------|-----------------------|--------------|
|                                        |          | HR(95% CI)          | <i>P</i>         | HR(95% CI)            | <i>P</i>     |
| <b>Gender</b>                          |          | 0.733(0.370-1.452)  | 0.374            |                       |              |
| Male                                   | 46       |                     |                  |                       |              |
| Female                                 | 43       |                     |                  |                       |              |
| <b>Age(y)</b>                          |          | 0.952 (0.455-1.992) | 0.897            |                       |              |
| <59                                    | 26       |                     |                  |                       |              |
| ≥59                                    | 63       |                     |                  |                       |              |
| <b>Tumor size<br/>(cm in diameter)</b> |          | 2.462(1.147-5.284)  | <b>0.021</b>     | 1.788(0.829-3.859)    | 0.138        |
| <5                                     | 37       |                     |                  |                       |              |
| ≥5                                     | 52       |                     |                  |                       |              |
| <b>Nodal metastasis</b>                |          | 3.135(1.588-6.188)  | <b>0.001</b>     |                       |              |
| N0                                     | 58       |                     |                  |                       |              |
| N1/2                                   | 31       |                     |                  |                       |              |
| <b>Differentiation</b>                 |          |                     |                  |                       |              |
| Well                                   | 21       | 2.434(1.345-4.405)  | <b>0.003</b>     | 1.767(0.965-3.238)    | 0.065        |
| Moderate                               | 55       |                     |                  |                       |              |
| Poor                                   | 13       |                     |                  |                       |              |
| <b>AJCC Stage</b>                      |          | 3.790(1.889-7.605)  | <b>&lt;0.001</b> | 2.603(1.264-5.358)    | <b>0.009</b> |
| I/II                                   | 56       |                     |                  |                       |              |
| III/IV                                 | 33       |                     |                  |                       |              |
| <b>CDK5 expression</b>                 |          | 3.457(1.563-7.645)  | <b>0.002</b>     | 2.428(1.089-5.413)    | <b>0.030</b> |
| Low                                    | 40       |                     |                  |                       |              |
| High                                   | 49       |                     |                  |                       |              |

**Table S3**

A list of AP-1 dependent genes related to cell proliferation and migration. (fold change>1.5,  $P<0.05$ )

| Genes | Description                                                        | Fold change<br>(ShCDK5/Scramble) | P-Value |
|-------|--------------------------------------------------------------------|----------------------------------|---------|
| FOS   | Homo sapiens FBJ murine osteosarcoma viral oncogene homolog        | 0.50                             | 0.001   |
| JUN   | Homo sapiens jun proto-oncogene                                    | 0.40                             | <0.001  |
| VEGFA | Homo sapiens vascular endothelial growth factor A                  | 0.47                             | <0.001  |
| MMP1  | Homo sapiens matrix metalloproteinase 1 (interstitial collagenase) | 0.25                             | 0.008   |
| MYC   | Homo sapiens v-myc avian myelocytomatosis viral oncogene           | 0.63                             | 0.004   |
| CD274 | Homo sapiens CD274 molecule (CD274)                                | 0.47                             | 0.001   |
| ZEB1  | Homo sapiens zinc finger E-box binding homeobox 1                  | 0.22                             | 0.021   |
| FOSL1 | Homo sapiens FOS-like antigen 1                                    | 0.33                             | <0.001  |
